# Supplementary material for: A functional link between the co-translational protein translocation pathway and the UPR
Source: eLife journal article supplement (doi:10.7554/elife.07426), 2015-05-20
Supplement: supp [file elife-07426-supp-v1.zip]

Figure 1 - figure supplement 1.

**Sec61 $\alpha$**

MAIKFLEVIKPFVCVILPEIQKPERKIQFKEKVLWTAITLFIFLVCCQIPLFGIMSSDSADPFYWMRVILASNRGT  
LMELGISPIVTSGLIMQLLAGAKIIEVGDTPKDRALFNGAQKLFGMIITIGQSIVYVMTGMYGDPSEMGAGIC  
LLITIQLFVAGLIVLLLDELLQKGYGLGSGISLFIATNICETIVWKAFSPTTVNTGRGMEFEGAIILFHLLATRT  
DKVRALREAFYRQNLPLNLMNLIATIFVFAVVIYFQGFRVDLPIKSARYRGQYNTYPIKLFYTSNIPILQSALVS  
NLYVISQMLSARFSGNLLVSLLGTWSDTSSGGPARAYPVGGLCYYLSPPEFSGSVLEDPVHAVVYIVFMLG  
SCAFFSKTWIEVSGSSAKDVAKQLKEQQMVMRGHRETSMVHELNRYIPTAAAFGGLCIGALSVLADFLGAI  
GSGTGILLAVTIIYQYFEIFVKEQSEVGSMGALLF

**Sec61 $\beta$**

MPGPTPSGTNVGSSGRSPSKAVAAARAAGSTVRQRKNASCGTRSAGRTTSAGTGGMWRFYTEDSPGL  
KVGPPVPLVMSLLFIASVFMLHIWGKYTRS

**Sec61 $\gamma$**

MDQVMQFVEPSRQFVKDSIRLVKRCTKPD RKEFQKIAMATAIGFAIMGFIGFFVKLIHIPINNIIVGG
