# Supplementary figures and images for: A functional link between the co-translational protein translocation pathway and the UPR
Source: eLife journal article supplement (doi:10.7554/elife.07426), 2015-05-20

Figure 1 - figure supplement 2. Ire1α is codepleted with the Sec61α translocon.

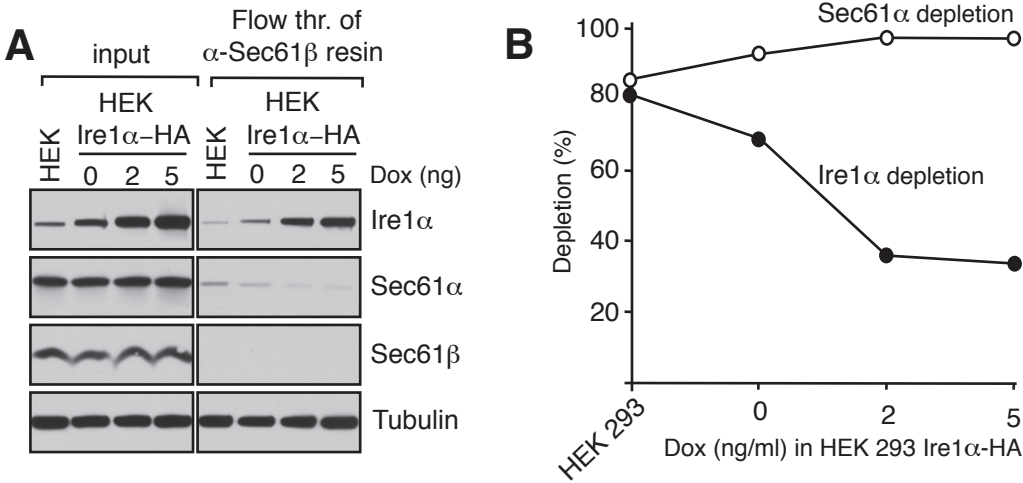

Supplement: supp [file elife-07426-supp-v1.zip]

Figure 5 - figure supplement 1. Insertion assays with XBP1u and its variants.

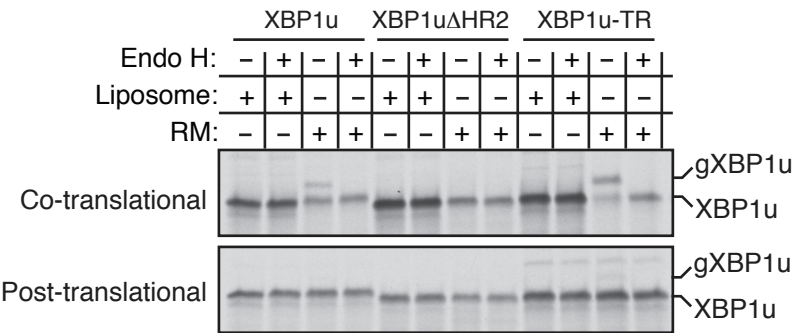

Supplement: supp [file elife-07426-supp-v1.zip]

Figure 3 - figure supplement 1. Sequence and hydrophobicity of XBP1u constructs.

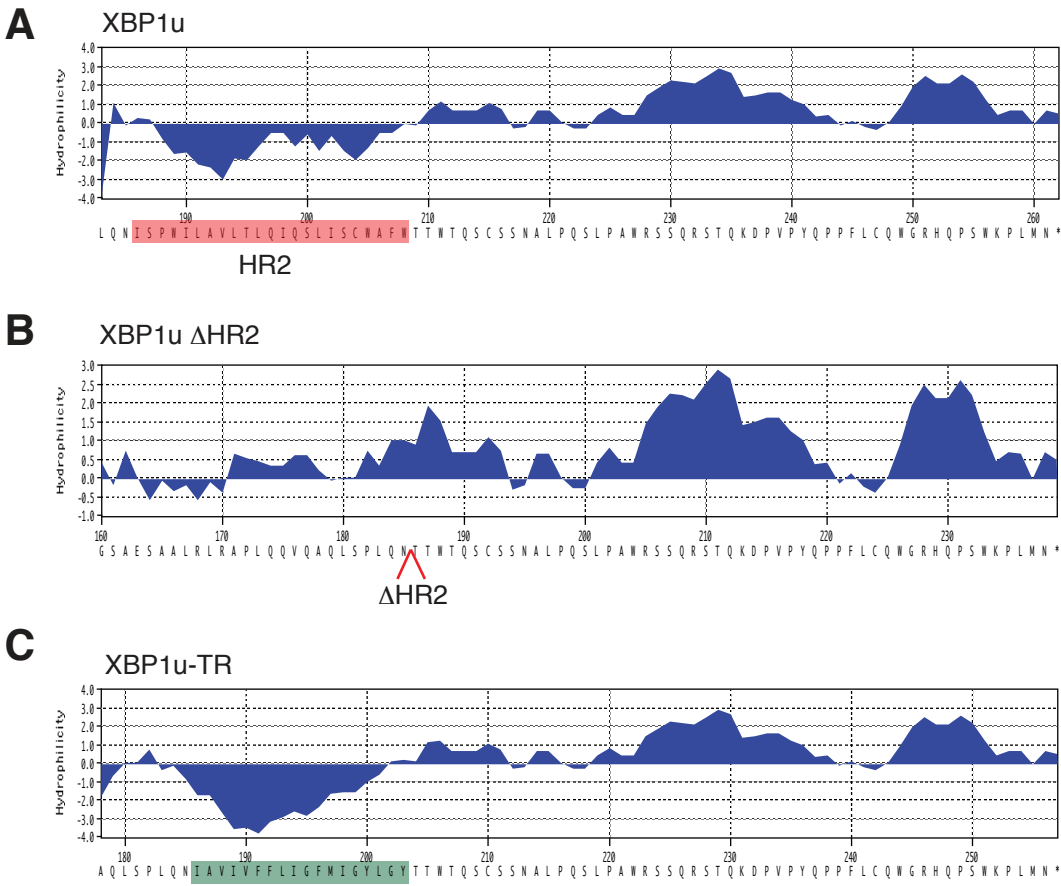

Supplement: supp [file elife-07426-supp-v1.zip]
